# Supplementary material
Source: MDPI journal article supplement (doi:10.3390/pr14101652)
Supplement: s1 [file processes-4288726-supplementary.pdf › processes-4288726-supplementary.pdf]

# Supplementary Material

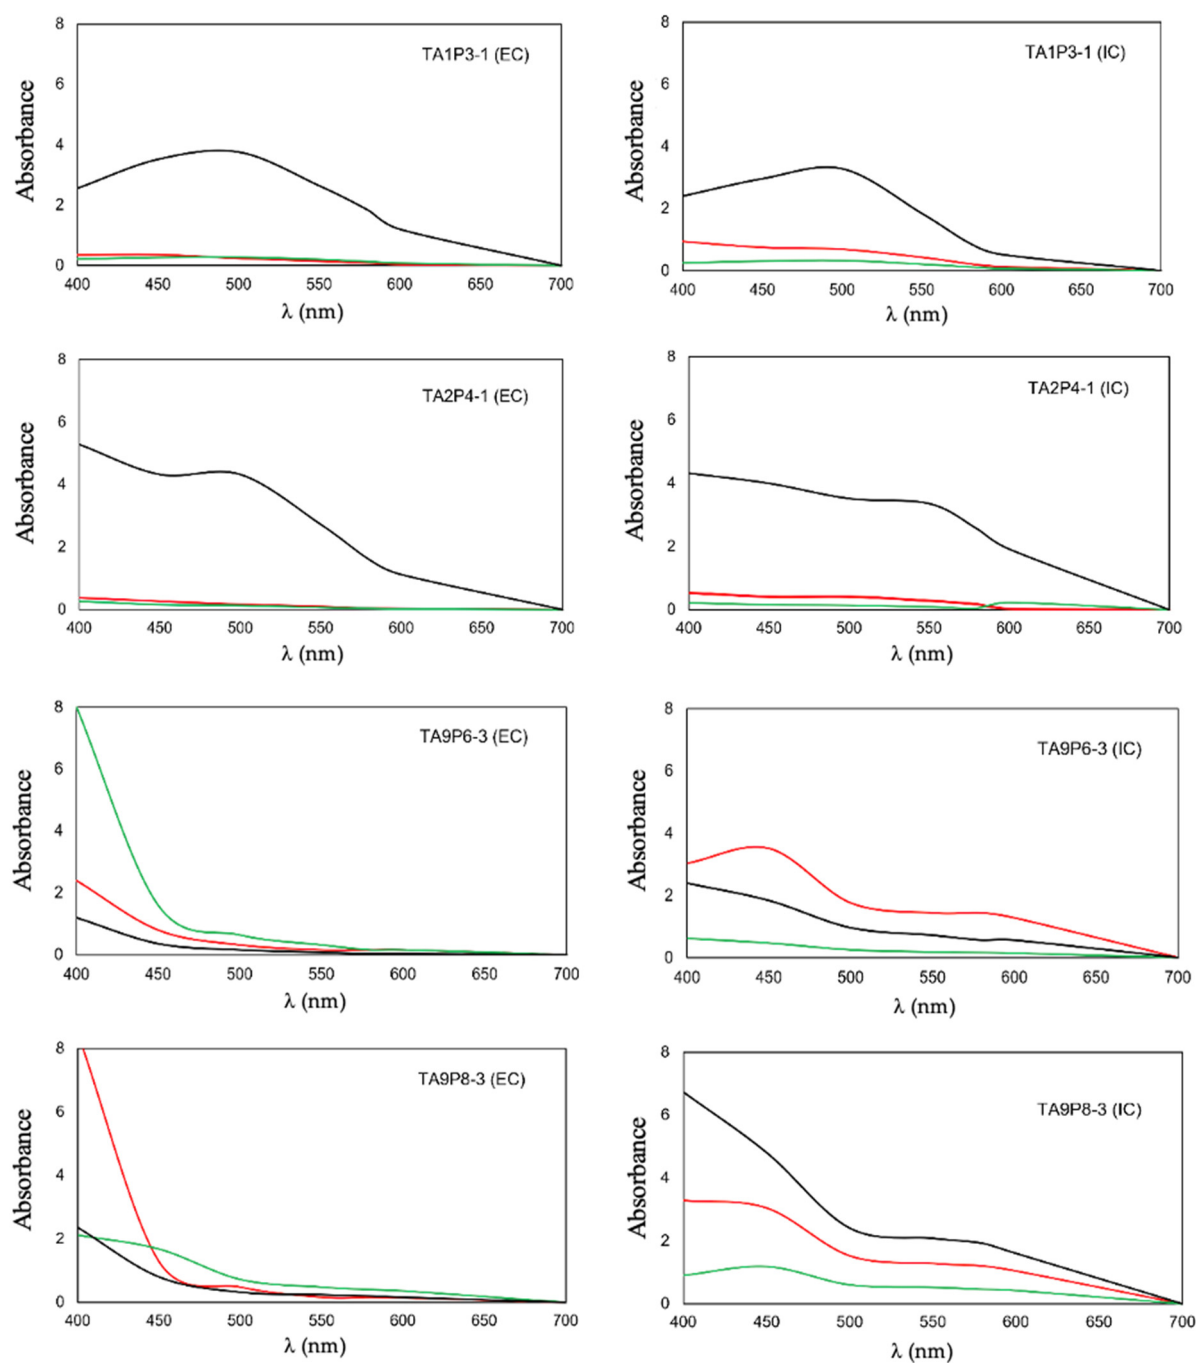

**Figure S1.** Visible spectra (400–700 nm) of extracellular (EC) and intracellular (IC) pigments obtained from aquatic fungal isolates cultivated in different culture media (-BD + YE in red, -ME in green and -YES in black) after 14 days. The spectra correspond to the isolates that showed the highest maximum absorbance values.
